# Supplementary material for: Molecular and metabolic pathways mediating curative treatment of a non-Hodgkin B cell lymphoma by Sindbis viral vectors and anti-4-1BB monoclonal antibody
Source: J Immunother Cancer. 2019 Jul 15;7:185. doi: 10.1186/s40425-019-0664-3 (PMC6632218; doi:10.1186/s40425-019-0664-3)
Supplement: Supplementary file 3 — Table S2. The upregulated cell movement pathway for SV vs. untreated group by IPA. SV induced SD upregulated gene sets are clustered by DAVID analysis (SV vs. Untreated). Gene clusters are ranked by enrichment score. (XLSX 9 kb) [file 40425_2019_664_MOESM3_ESM.xlsx]

## Sheet: Sheet0
© 2000-2018 QIAGEN. All rights reserved.
ID	Genes in dataset	Prediction (based on measurement direction)	Expr Log Ratio	Findings
Il21	IL21	Increased	2.57	Increases (2)
Lag3	LAG3	Decreased	1.76	Decreases (3)
Il10	IL10	Decreased	1.66	Decreases (2)
Ccl1	CCL1	Increased	1.12	Increases (1)
Ccr5	CCR5	Increased	1.05	Increases (3)
Pdcd1	PDCD1	Decreased	1.01	Decreases (3)
Tnfrsf8	TNFRSF8	Increased	1	Increases (1)
Cxcr5	CXCR5	Increased	0.98	Increases (1)
Ccr2	CCR2	Increased	0.9	Increases (9)
Cxcr3	CXCR3	Increased	0.77	Increases (1)
Sh2d1a	SH2D1A	Increased	0.68	Increases (1)
Batf	BATF	Increased	0.67	Increases (7)
Pycard	PYCARD	Increased	0.64	Increases (3)
Ccr4	CCR4	Increased	0.62	Increases (4)
Ccl5	CCL5	Increased	0.62	Increases (2)
Itgb1	ITGB1	Increased	0.51	Increases (1)
S1pr2	S1PR2	Increased	0.5	Increases (1)
Lcp1	LCP1	Affected	0.5	Affects (1)
Tnfsf14	TNFSF14	Increased	0.5	Increases (1)
Hspd1	HSPD1	Decreased	0.41	Decreases (1)
Cbfb	CBFB	Decreased	0.4	Decreases (1)
Jak3	JAK3	Increased	0.36	Increases (1)
Rap1a	RAP1A	Decreased	0.31	Decreases (3)
Was	WAS	Increased	0.29	Increases (2)
Etv6	ETV6	Increased	0.26	Increases (3)
Rac2	RAC2	Increased	0.25	Increases (36)
Apbb1ip	APBB1IP	Increased	-0.21	Decreases (2)
Pecam1	PECAM1	Decreased	-0.34	Increases (10)
Ldlr	LDLR	Decreased	-0.41	Increases (1)
Bach2	BACH2	Increased	-0.46	Decreases (1)
S1pr1	S1PR1	Decreased	-0.58	Increases (6)
Gpr132	GPR132	Increased	-0.6	Decreases (1)
