# Supplementary material for: Molecular and metabolic pathways mediating curative treatment of a non-Hodgkin B cell lymphoma by Sindbis viral vectors and anti-4-1BB monoclonal antibody
Source: J Immunother Cancer. 2019 Jul 15;7:185. doi: 10.1186/s40425-019-0664-3 (PMC6632218; doi:10.1186/s40425-019-0664-3)
Supplement: Supplementary file 5 — Table S4. The SD expressed genes list for SV + α4-1BB vs. SV group by RNA-Seq (q < 0.05, Log2FC ≥ 1 and Log2FC ≤ − 1). (XLSX 52 kb) [file 40425_2019_664_MOESM5_ESM.xlsx]

## Sheet: Sv-LacZplus41BB vs Sv-LacZ
gene	baseMean	log2FC	log2FCunshrunk	pvalue	padj
Ret	794.7	3.23	4.01	0	0
Gzmk	1785.2	2.77	3.04	0	0
Ermn	17.7	2.73	4.67	1.64e-13	2.4026e-11
Ccl8	29.5	2.55	3.64	1.0687e-11	9.75123e-10
Wdr95	226	2.44	2.58	0	0
Ociad2	184.7	2.4	2.5	0	0
Col6a5	17.7	2.39	5.83	3.12082e-10	1.87521e-08
Trp73	22	2.15	3.6	9.67111e-09	4.01875e-07
Ncald	297.2	2.11	2.28	0	0
Gzmb	4113.9	2.11	2.3	0	0
Wipf3	37.6	2.1	2.84	2.8184e-11	2.25018e-09
2900011O08Rik	14.8	2.04	2.95	8.02771e-09	3.39715e-07
Klrg1	746.6	2.03	2.13	0	0
Clip4	39.8	1.98	2.46	1.07314e-10	7.20092e-09
Cd70	12.5	1.98	3.01	2.86646e-08	1.05399e-06
Adgrg1	449.6	1.93	2.06	0	0
Ccl5	22142.8	1.91	2.08	0	0
Ccr5	1338.8	1.89	1.96	0	0
Faxc	12.4	1.88	3.08	3.97104e-07	1.08013e-05
Dpysl5	94.9	1.84	2.16	2.1308e-11	1.75818e-09
Gm6637	196.3	1.83	2.02	3e-15	7.75e-13
Mpl	45.7	1.8	2.67	8.7008e-07	2.1374e-05
Cdkn2a	59.4	1.79	2.09	6.9692e-11	5.06736e-09
1700011L03Rik	6.7	1.77	6.04	2.27762e-06	4.92146e-05
Treml1	31.4	1.75	2.44	6.78148e-07	1.72998e-05
Ccr2	1142.1	1.74	1.86	0	0
Saa3	14.8	1.71	5.22	3.98998e-06	7.9546e-05
Hist1h1b	56.5	1.7	1.96	2.20246e-09	1.0669e-07
Osr2	54.7	1.69	2.19	3.53222e-07	9.87247e-06
Col6a1	15.6	1.69	4.32	7.88532e-06	0.000143684
Tff1	8.6	1.69	3.25	8.35557e-06	0.000150881
Fam57b	23.3	1.68	5.02	4.51002e-07	1.21145e-05
Col3a1	82.1	1.68	3.39	9.30623e-06	0.000166134
Cldnd2	53.5	1.67	1.88	1.0508e-11	9.69027e-10
Col6a2	16.9	1.67	3.3	1.10729e-05	0.000192062
Insrr	64.7	1.62	1.77	7.83e-13	9.2478e-11
Dixdc1	18.6	1.62	2.45	5.32967e-06	0.000102236
Gm33460	48.9	1.61	1.8	6.8836e-11	5.03962e-09
Csf2	72.9	1.61	1.86	3.26984e-09	1.51582e-07
Gcg	62.2	1.61	3.73	1.51878e-05	0.000252082
Nkg7	8456.1	1.57	1.62	0	0
Tmem40	47.5	1.57	1.98	8.68057e-07	2.13547e-05
Stk32c	341	1.55	1.64	0	1e-15
Serpine2	31.1	1.55	2.06	2.3811e-06	5.09454e-05
Wdr31	15.1	1.55	2.2	1.29789e-05	0.000219647
S100a4	1170.3	1.54	1.73	2.17689e-10	1.37009e-08
AA467197	30.3	1.54	1.86	3.67692e-07	1.01616e-05
Dcn	49	1.54	2.29	5.1546e-06	9.93196e-05
Gp1bb	21.6	1.54	2.35	3.11336e-05	0.000458104
Osbpl3	1358.5	1.52	1.57	0	0
Smpdl3b	185.8	1.52	1.62	6e-15	1.269e-12
Gldc	15.3	1.51	1.94	9.20939e-06	0.000164918
Arsb	1795.9	1.5	1.59	0	2e-15
Bspry	174.2	1.5	1.74	3.87559e-08	1.37863e-06
Gm15056	28.9	1.5	2.19	4.6853e-05	0.000651072
Esm1	680.1	1.49	1.62	2.19e-13	3.0475e-11
Pif1	204	1.49	1.64	3.8699e-11	2.9793e-09
2310031A07Rik	64.6	1.49	1.87	1.65027e-06	3.69596e-05
Pglyrp1	1046.5	1.48	1.61	9.35e-13	1.07545e-10
Slc35d3	110.5	1.46	1.56	3.8e-14	6.509e-12
Pbk	107.5	1.46	1.55	8.9e-14	1.3965e-11
Gm2788	29.7	1.46	1.78	1.10491e-06	2.61373e-05
Slc16a11	9.1	1.46	2.52	9.03558e-05	0.00114376
Miat	31.2	1.45	1.67	5.47979e-08	1.88087e-06
Samd14	203.2	1.44	1.65	2.05957e-08	8.0356e-07
Tnfsf4	81.6	1.44	1.71	2.52083e-07	7.28169e-06
Gp5	24.7	1.44	1.94	1.93938e-05	0.000307396
Kcnj5	5.3	1.44	3.82	6.73173e-05	0.000887528
Vax2	12.7	1.43	2.3	0.000119847	0.00144326
Car5b	136	1.42	1.49	0	7.2e-14
Reg2	5.6	1.42	5.34	5.50297e-06	0.000105093
Tpbg	19.3	1.42	2.07	7.64882e-05	0.000989899
Pf4	162.2	1.42	2.19	0.000131755	0.0015659
Trpc6	7.4	1.42	2.85	0.000145431	0.00169571
Ppbp	30.6	1.41	1.97	6.28953e-05	0.000839497
Adap1	1257.2	1.4	1.48	1e-15	2.09e-13
Kif2c	341.3	1.4	1.48	4e-15	8.96e-13
Tff3	16.7	1.4	1.76	1.49167e-05	0.000247821
Muc13	227	1.39	1.53	8.74588e-10	4.68394e-08
Serpina3h	8.8	1.39	2.39	0.000211375	0.00231292
Rgs16	7742.7	1.38	1.44	0	0
Fhl2	217.6	1.38	1.45	0	2.7e-14
Serping1	49.6	1.38	1.61	2.11203e-07	6.24735e-06
Slc22a3	85.3	1.38	1.65	1.65896e-06	3.7106e-05
Nfe2	91.3	1.38	1.81	4.06894e-05	0.000577046
Igf2bp3	26.6	1.37	1.7	2.05006e-05	0.000322861
Ppp1r3g	7.3	1.37	2.61	0.000309048	0.00316668
Map6	151	1.36	1.45	4.41e-13	5.6742e-11
Fkbp10	29.4	1.36	1.89	6.66314e-05	0.000879831
Tuba8	42.2	1.36	1.95	0.000161736	0.00185032
Mmrn1	13.3	1.36	1.98	0.000186838	0.0020841
Hist1h2ag	6.4	1.36	2.16	0.00032685	0.00331756
Rasgef1a	270.7	1.34	1.42	4e-15	8.29e-13
Fam81a	55.4	1.34	1.55	1.0762e-06	2.55282e-05
Col1a2	95	1.34	1.73	2.78507e-05	0.000418368
Fhl1	19.9	1.34	1.9	0.000148394	0.00172106
Fam19a3	168.7	1.33	1.48	2.05832e-08	8.0356e-07
Cdk1	1228.8	1.32	1.41	5.17e-13	6.5015e-11
1700001O22Rik	140.3	1.32	1.42	7.2879e-11	5.23667e-09
Pimreg	230	1.32	1.42	1.77202e-10	1.13601e-08
F2rl2	42.8	1.32	1.52	1.18725e-06	2.78181e-05
Dach1	18.3	1.32	1.82	0.000178436	0.00200384
Cenpf	495.6	1.31	1.39	6.5e-14	1.047e-11
Tpx2	1113.7	1.31	1.39	1.564e-12	1.69644e-10
Hmmr	311.7	1.31	1.42	2.96665e-10	1.80141e-08
Tubb1	17.5	1.31	1.94	0.000238729	0.00255707
Upk3b	15.3	1.31	2.92	0.000536206	0.00505293
Kif18b	606.6	1.3	1.37	1.37e-13	2.0605e-11
Adgrg7	5.3	1.3	3.04	0.000330242	0.00334607
Cep55	503.9	1.29	1.36	1.297e-12	1.42468e-10
Tpsab1	262.4	1.29	1.5	4.00108e-06	7.9675e-05
Unc5b	14.9	1.29	1.8	0.000176607	0.00198794
Sytl2	1359.2	1.28	1.34	1.2e-14	2.258e-12
Kif14	299.1	1.28	1.36	6.3504e-11	4.68003e-09
Tg	98.4	1.28	1.39	2.03336e-09	9.93351e-08
Ube2c	1391	1.28	1.4	6.7059e-09	2.91293e-07
Ifng	1413.7	1.28	1.45	2.02959e-07	6.03453e-06
Angpt1	63.2	1.28	1.48	3.01792e-06	6.24777e-05
Aunip	24.6	1.28	1.61	9.96916e-05	0.00123976
Birc5	1540.7	1.27	1.41	2.84001e-08	1.0465e-06
AC153938.2	40.5	1.27	1.51	9.03929e-06	0.00016204
Gng3	34.8	1.27	1.49	1.4135e-05	0.000236658
Robo3	27.3	1.27	1.51	2.28409e-05	0.000356786
Myct1	34.7	1.27	1.65	0.000136819	0.00161491
Kif22	1022.2	1.26	1.35	3.0297e-11	2.38575e-09
Rad51	401.4	1.26	1.34	5.9473e-11	4.4018e-09
Havcr2	486.2	1.26	1.36	1.36398e-10	9.01221e-09
S100a6	3227.2	1.26	1.37	1.23622e-09	6.42128e-08
Neurl1b	49.9	1.26	1.52	2.53908e-05	0.000389212
Irx3	8.6	1.26	2.06	0.000738312	0.00656317
Scrn1	9.5	1.26	2.43	0.000777272	0.00683583
Depdc1b	350.8	1.25	1.32	7.285e-12	6.94043e-10
Prc1	830.9	1.25	1.36	9.49362e-10	4.99769e-08
Lxn	79	1.25	1.35	3.3238e-09	1.53259e-07
Ccnb1	160.8	1.25	1.37	1.43975e-08	5.81463e-07
Ccna2	1680.2	1.24	1.3	7e-15	1.408e-12
Anxa2	5777.8	1.24	1.34	3.38642e-10	2.01375e-08
Gzma	3261.2	1.24	1.86	0.000818033	0.00712114
Shcbp1	274.8	1.23	1.29	2.78e-13	3.7763e-11
Cdca8	1251.5	1.23	1.3	2.537e-12	2.68383e-10
2610318N02Rik	193.2	1.23	1.32	8.29576e-10	4.48465e-08
Bst1	74.2	1.23	1.33	7.17508e-09	3.07797e-07
Sgo2a	143.4	1.23	1.33	9.32616e-09	3.88478e-07
Lrr1	59	1.23	1.37	8.05362e-07	1.99033e-05
Epas1	1633	1.23	1.59	0.000163902	0.00187309
Plppr3	42.4	1.23	1.76	0.000686412	0.00620544
Dapk2	315.5	1.22	1.27	0	7.7e-14
Aurkb	806.6	1.22	1.28	4.93e-13	6.2484e-11
Plk1	794.8	1.22	1.3	3.0134e-11	2.38379e-09
Heatr9	204.6	1.22	1.36	3.37141e-07	9.49543e-06
Npy	11.8	1.22	1.86	0.00104632	0.0087126
Myrf	11.2	1.22	2.86	0.00133764	0.0105717
Chsy1	2251.6	1.21	1.27	3e-15	6.66e-13
Mxd3	280.1	1.21	1.26	2.7e-14	4.709e-12
Sapcd2	275.5	1.21	1.3	1.05708e-09	5.54083e-08
Troap	236.4	1.21	1.31	6.8032e-09	2.94038e-07
Tigit	2942.9	1.21	1.33	3.75894e-08	1.34767e-06
Rtkn	29.5	1.21	1.48	5.85377e-05	0.000790511
Alox12	39.7	1.21	1.5	7.16193e-05	0.000936912
Il13	60.8	1.21	1.61	0.000618026	0.00569939
Hist1h3g	9.3	1.21	1.63	0.000848562	0.00735719
Cdca5	791.4	1.2	1.25	0	1.5e-14
Gimap7	2437.5	1.2	1.27	1.5784e-11	1.35417e-09
Ccnb2	1255.4	1.2	1.28	8.3138e-11	5.80453e-09
Fam78b	52.7	1.2	1.45	1.68266e-05	0.000274023
Gm9531	16	1.2	1.66	0.00049558	0.00473806
Tmem98	10.9	1.2	2.01	0.00130688	0.0103714
Eomes	4109.7	1.19	1.22	0	0
Penk	1018	1.19	1.26	1.1066e-11	9.9396e-10
Serpinb6b	1199	1.19	1.26	1.2367e-11	1.08259e-09
Prr11	288	1.19	1.32	2.75902e-07	7.89042e-06
Ica1	85.1	1.19	1.38	6.48648e-06	0.000121323
Gm4841	29.9	1.19	1.54	0.000217592	0.00236743
Fbxo41	15.3	1.19	1.51	0.000280021	0.00291176
Col6a6	6.3	1.19	3.11	0.00140886	0.0110285
Cst7	1893.9	1.18	1.22	0	1.5e-14
Top2a	4726.3	1.18	1.23	0	1.3e-13
Ncaph	822.4	1.18	1.24	3.2e-14	5.458e-12
Cdca2	444.5	1.18	1.24	1.0913e-11	9.85295e-10
Rrm2	1718.2	1.18	1.26	3.6422e-10	2.15102e-08
Rad54l	350.2	1.18	1.27	2.64214e-09	1.26566e-07
Ttk	211.5	1.18	1.27	4.52781e-09	2.0387e-07
BC030867	129.6	1.18	1.27	2.29567e-08	8.8171e-07
Cdc25c	143.9	1.18	1.3	5.80037e-07	1.52017e-05
Rai14	77.8	1.18	1.34	2.2018e-06	4.7942e-05
Hist1h3c	11.8	1.18	1.67	0.00120273	0.0097472
Gbp11	355.1	1.17	1.23	2.7687e-11	2.23117e-09
Foxd2os	95	1.17	1.24	8.9538e-11	6.20111e-09
Fignl1	145.7	1.17	1.23	1.17041e-10	7.79291e-09
Nek2	554.5	1.17	1.26	3.39068e-09	1.5573e-07
E2f8	535.1	1.17	1.27	3.38387e-08	1.22852e-06
C78197	19.1	1.17	1.65	0.000739609	0.00657112
Mki67	5899.1	1.16	1.24	4.41811e-09	1.99451e-07
E2f7	275.3	1.16	1.26	5.55322e-08	1.9001e-06
Spp1	51	1.16	1.36	4.3611e-05	0.000611938
Gp9	24.8	1.16	1.46	0.000374093	0.00370334
Vash1	14.6	1.16	1.66	0.00121184	0.00979752
Gm867	11.8	1.16	1.91	0.00159496	0.0121275
Nlrp6	5.5	1.16	3.11	0.00203899	0.0147555
Tyms	809.6	1.15	1.19	0	7.4e-14
Espl1	809.6	1.15	1.22	2.1057e-11	1.74581e-09
Ncapg	383.1	1.15	1.22	8.96587e-10	4.77211e-08
Ckap2l	455.4	1.15	1.24	2.18745e-08	8.49607e-07
Gm12250	177.3	1.15	1.28	5.21983e-07	1.38486e-05
Spns2	183.2	1.15	1.38	6.60303e-05	0.000873826
Il20ra	9.2	1.15	1.8	0.0018255	0.0135705
Nusap1	813.1	1.14	1.19	1.064e-12	1.20697e-10
Serpinb9	1224.7	1.14	1.21	1.4312e-11	1.24029e-09
Spag5	1183.2	1.14	1.2	3.254e-11	2.53918e-09
Cenpe	685.5	1.14	1.21	1.07187e-10	7.20092e-09
Bub1	362.3	1.14	1.22	3.72015e-09	1.7017e-07
Serpina3f	452	1.14	1.24	7.57155e-08	2.52068e-06
Ccl4	2257.9	1.14	1.43	0.000269059	0.0028172
Ckap2	394.5	1.13	1.17	9e-15	1.82e-12
Cdkn3	129.2	1.13	1.18	1.04402e-10	7.08594e-09
Sgo1	162.8	1.13	1.19	6.37562e-10	3.56973e-08
Serpina3g	2916.5	1.13	1.23	3.47733e-08	1.25453e-06
Ccl1	31	1.13	1.43	0.000689342	0.00622393
Prf1	1704.5	1.12	1.14	0	0
Spc24	506	1.12	1.16	1.96e-13	2.7903e-11
Kif11	1109.9	1.12	1.17	2.93e-13	3.9403e-11
Bub1b	1344.3	1.12	1.18	7.1678e-11	5.17191e-09
Lgals1	11014.9	1.12	1.18	2.67958e-10	1.63955e-08
Esco2	149.5	1.12	1.21	1.1098e-07	3.55443e-06
Tek	24.8	1.12	1.43	0.000437329	0.00423899
Msantd3	9.2	1.12	1.65	0.00218942	0.0156861
Acot7	2318.6	1.11	1.17	2.1554e-11	1.77001e-09
Ttn	292.1	1.11	1.21	8.00258e-08	2.65905e-06
Nuf2	279.6	1.11	1.21	5.67465e-07	1.49403e-05
Rgs18	52.3	1.11	1.38	0.00035968	0.00359159
Dio2	18.9	1.11	1.6	0.00146514	0.0113454
Pcdh7	8.7	1.11	1.82	0.00262535	0.0182557
Kif4	650.2	1.1	1.15	1.0577e-11	9.7021e-10
Clspn	637.1	1.1	1.17	1.40179e-09	7.11437e-08
Dyrk3	249.1	1.1	1.21	4.13857e-07	1.12216e-05
1700020L24Rik	90.2	1.1	1.23	4.95344e-06	9.57647e-05
Lmtk3	107.1	1.1	1.28	4.0952e-05	0.000579817
Ms4a3	31.1	1.1	1.55	0.00295468	0.0199974
Asf1b	1276.4	1.09	1.14	1.089e-12	1.22731e-10
Pask	202.9	1.09	1.15	7.33845e-10	4.0184e-08
Cit	784.3	1.09	1.16	2.82977e-09	1.34805e-07
Pclaf	522.9	1.09	1.19	6.53497e-07	1.68202e-05
Klrc1	236.6	1.09	1.2	1.61735e-06	3.64115e-05
Rnase2a	5.3	1.09	1.76	0.00373241	0.0242431
6530402F18Rik	553.7	1.08	1.1	0	0
Cdc45	628.7	1.08	1.11	0	2e-15
Podnl1	2382.6	1.08	1.12	4.8e-14	7.963e-12
Lilr4b	1553.9	1.08	1.16	4.2117e-08	1.48529e-06
Perp	113.8	1.08	1.17	9.0726e-08	2.94646e-06
Aspm	319.4	1.08	1.17	2.90751e-07	8.30132e-06
Gzmc	56.6	1.08	1.32	0.000285251	0.00295622
Clstn3	34.6	1.08	1.39	0.000965299	0.0081681
Traj35	15.6	1.08	1.44	0.00113218	0.00930213
Pcp4l1	21	1.08	1.56	0.00223183	0.0159437
Serpina3n	16.7	1.08	1.62	0.0029353	0.0198897
Chil3	42.4	1.08	1.54	0.0031649	0.0211381
AC131739.1	7.2	1.08	1.94	0.00392805	0.0251819
Kif20a	898.5	1.07	1.13	3.27401e-10	1.95364e-08
Tjp2	411.7	1.07	1.14	2.03345e-08	7.96974e-07
Gm5391	5.3	1.07	2.14	0.00473324	0.0291503
Cdc20	1268.9	1.06	1.1	1.22e-13	1.8672e-11
Kcnk5	399.5	1.06	1.1	6.1e-13	7.5084e-11
Psrc1	122.1	1.06	1.12	2.47548e-09	1.19245e-07
Iqgap3	284.2	1.06	1.13	7.90371e-09	3.36542e-07
Cks1b	772.5	1.06	1.14	6.32352e-08	2.15939e-06
Grb10	61	1.06	1.32	0.000464215	0.00447729
Ptger3	20.8	1.06	1.62	0.00423248	0.0266871
Cdkn2c	421.3	1.05	1.08	8.39e-13	9.7786e-11
Ndc80	345.5	1.05	1.1	1.738e-10	1.12491e-08
S100a10	7676.1	1.05	1.1	5.19438e-10	2.97598e-08
Mcm10	477.4	1.05	1.11	1.26191e-09	6.53503e-08
Fut7	69.8	1.05	1.18	2.47461e-05	0.000381705
Tfr2	139.5	1.05	1.34	0.00118787	0.00964893
Hist1h2bm	8.5	1.05	1.8	0.00581644	0.0341288
Stmn1	257.1	1.04	1.1	2.99321e-09	1.40648e-07
Ska1	210.9	1.04	1.13	4.20755e-06	8.29248e-05
Klrc2	53.2	1.04	1.17	2.62465e-05	0.000399137
Cym	46.2	1.04	1.31	0.000743213	0.00659505
Hist1h2ai	9.8	1.04	1.51	0.00438326	0.0274525
Phlda3	37.7	1.03	1.2	0.000147077	0.00171027
Gm14148	21.4	1.03	1.25	0.000571785	0.00531273
Hist1h2bj	17.7	1.03	1.24	0.00123447	0.00991543
a	12.6	1.03	1.58	0.00495729	0.0303151
4930519L02Rik	9.9	1.03	1.87	0.00678671	0.038499
Knstrn	855.1	1.02	1.05	5e-15	1.127e-12
Chst11	1091.1	1.02	1.05	1.6e-14	2.938e-12
Spdl1	204.5	1.02	1.07	3.90837e-10	2.29251e-08
Melk	329.8	1.02	1.07	6.99696e-10	3.87982e-08
Kifc1	310.5	1.02	1.09	8.09791e-08	2.68555e-06
Anln	217.2	1.02	1.1	1.26591e-06	2.93818e-05
Gm17745	84	1.02	1.11	1.33693e-06	3.06587e-05
Runx2os1	41.2	1.02	1.28	0.00115656	0.00943911
H1fx	65.9	1.02	1.27	0.00122351	0.00985956
Col1a1	89.2	1.02	1.37	0.00211355	0.0152185
Slc30a2	29	1.02	1.34	0.00256185	0.0179153
Mt3	18.3	1.02	1.35	0.00387112	0.0249284
Cxcr6	818	1.01	1.04	7.2e-14	1.1496e-11
Kif15	595.3	1.01	1.07	1.3194e-08	5.3663e-07
Ect2	255.1	1.01	1.12	1.58095e-05	0.000260397
Tex15	58.4	1.01	1.12	4.19556e-05	0.000591115
Ddah2	90	1.01	1.15	6.54204e-05	0.000867827
G0s2	77.4	1.01	1.24	0.000666118	0.00604589
Hist1h3a	32.2	1.01	1.25	0.00141542	0.0110568
Pde10a	17	1.01	1.3	0.00250149	0.0175572
Morc1	8.4	1.01	2.01	0.0073722	0.0409184
Lmnb1	6788.3	1	1.03	5.3e-14	8.633e-12
Bard1	316.8	1	1.05	1.61398e-10	1.0583e-08
Ska3	252.1	1	1.05	4.67858e-10	2.71657e-08
Tk1	1004.9	1	1.05	5.56077e-10	3.14412e-08
Sytl3	850.3	1	1.09	2.43634e-06	5.187e-05
Bag2	63	1	1.1	1.05788e-05	0.000184835
F10	33.6	1	1.38	0.00470406	0.029055
C1s1	21.8	1	1.52	0.00514854	0.0311532
Usp50	16.7	1	1.55	0.00682762	0.0386674
Dlk2	11.4	1	1.71	0.00819964	0.0442243
Efna5	6.6	1	1.98	0.0084198	0.045107
Ptk2	617.3	-1	-1.03	0	1.3e-13
Myo10	1090.4	-1	-1.06	3.72282e-08	1.3375e-06
Tmem8b	139.4	-1	-1.09	8.05594e-07	1.99033e-05
Tgm2	2908.8	-1	-1.09	1.14713e-06	2.70199e-05
Dysf	302	-1	-1.1	3.85982e-06	7.73084e-05
Mreg	104.8	-1	-1.11	7.36288e-06	0.000135655
Fam167a	155	-1	-1.11	1.28407e-05	0.000217951
Adam33	60.3	-1	-1.17	0.000269921	0.00282288
Eps8	43.8	-1	-1.19	0.000345582	0.00347294
Syt3	18.7	-1	-1.32	0.00177185	0.0132488
Rubcnl	142.1	-1	-1.34	0.00191067	0.0140151
Napb	20.4	-1	-1.57	0.00462846	0.0286805
Sat2	9	-1	-1.91	0.00816635	0.0441025
Tsix	8.2	-1	-2.12	0.00851326	0.0454946
Gm42870	22.1	-1	-2.22	0.00853456	0.045552
Myo9a	1226.4	-1.01	-1.06	1.32616e-09	6.80644e-08
Tns3	884	-1.01	-1.1	6.53259e-07	1.68202e-05
Nat8l	123.4	-1.01	-1.11	2.76974e-06	5.81074e-05
Col17a1	97	-1.01	-1.13	1.15146e-05	0.00019798
Adrb1	207	-1.01	-1.15	3.22949e-05	0.000470376
Sh3tc1	174.9	-1.01	-1.16	6.02231e-05	0.000809468
Abca9	130.3	-1.01	-1.29	0.000972618	0.00822599
Igkv6-25	29.5	-1.01	-1.73	0.00677557	0.0384484
Gm36159	8.5	-1.01	-2.04	0.00730902	0.0406463
Gm8463	8.7	-1.01	-3.66	0.00767977	0.0422583
Ebf1	216.1	-1.01	-2.27	0.00780224	0.0428225
Tbc1d8	696.1	-1.02	-1.12	1.76716e-06	3.91706e-05
Adgrl2	148.4	-1.02	-1.13	3.22066e-06	6.58172e-05
Ppp1r14a	48.4	-1.02	-1.4	0.00191023	0.0140151
Padi4	34.4	-1.02	-1.28	0.00207176	0.0149487
Gm30292	19.5	-1.02	-1.37	0.00211972	0.0152501
Slc13a2	13.1	-1.02	-1.9	0.00513121	0.031092
Epha4	19.9	-1.02	-1.81	0.00532302	0.0319036
Stfa3	14.7	-1.02	-1.71	0.00573545	0.03378
Gm25776	9.5	-1.02	-1.77	0.00583952	0.0341944
Crisp3	7.4	-1.02	-4.01	0.00631034	0.0363102
Igha	3248.3	-1.02	-1.95	0.00641731	0.0368254
Igkv1-135	261.8	-1.02	-1.85	0.00659498	0.037626
Pax5	1019.4	-1.02	-2.07	0.00731904	0.0406888
Plxna1	900.2	-1.03	-1.11	8.8565e-08	2.88715e-06
Cpq	349.9	-1.03	-1.12	6.16578e-07	1.60618e-05
Hck	1125	-1.03	-1.12	6.33062e-07	1.64104e-05
Pnck	68.8	-1.03	-1.16	6.44155e-06	0.000120613
Nectin4	97.5	-1.03	-1.18	5.4781e-05	0.000746208
Cd180	364.5	-1.03	-1.2	6.19509e-05	0.000828815
Btnl2	69.3	-1.03	-1.22	0.000153943	0.00177694
Zfyve9	64.7	-1.03	-1.3	0.000586599	0.0054299
Krt80	33	-1.03	-1.33	0.000948373	0.00806047
Cmtm8	27.8	-1.03	-1.34	0.000991324	0.00834735
Adgra2	49.3	-1.03	-1.44	0.00185328	0.0136832
Tnnc2	16.7	-1.03	-1.54	0.0023561	0.0166725
Klhl14	29.4	-1.03	-1.95	0.00571596	0.0337069
Rasgrp3	260.5	-1.03	-1.87	0.00622245	0.0358884
Tcn2	1368.6	-1.04	-1.08	1e-15	1.65e-13
Ppp1r32	136.8	-1.04	-1.13	2.10955e-07	6.24735e-06
Fcgrt	2555.6	-1.04	-1.13	5.86913e-07	1.53586e-05
Nphp3	103.3	-1.04	-1.16	1.69151e-06	3.76874e-05
Cd300lf	581.8	-1.04	-1.16	3.88186e-06	7.76596e-05
Ly86	762.3	-1.04	-1.17	1.7092e-05	0.000277805
Clec12a	552.3	-1.04	-1.2	3.21854e-05	0.000469575
Arhgap32	163.9	-1.04	-1.22	6.59713e-05	0.00087379
Eva1a	33	-1.04	-1.25	0.000198678	0.00220193
Wtip	28.7	-1.04	-1.44	0.00145045	0.011259
B3gnt7	121.7	-1.04	-1.43	0.00184079	0.0136535
Npc1l1	18.3	-1.04	-1.68	0.00321881	0.0214113
Prex2	8.7	-1.04	-2.21	0.00559915	0.0331698
Cd209c	9.8	-1.04	-2.31	0.0059379	0.0346646
Zbtb10	1450.8	-1.05	-1.09	3.329e-12	3.41742e-10
Pla2g7	1374.2	-1.05	-1.13	6.385e-08	2.17607e-06
Fcgr1	319.2	-1.05	-1.15	3.57441e-07	9.94204e-06
Pla2g15	1269.3	-1.05	-1.15	5.99116e-07	1.56542e-05
B230303O12Rik	93.4	-1.05	-1.16	7.30029e-07	1.84055e-05
Nr3c2	42.8	-1.05	-1.28	0.00015907	0.00182755
Gpr4	64.4	-1.05	-1.29	0.000280027	0.00291176
Chn1	24	-1.05	-1.26	0.000645308	0.00589112
Bmf	141.4	-1.05	-1.4	0.000932999	0.00794546
Gm44860	11.3	-1.05	-2.25	0.00516245	0.0311936
Mcf2	7.3	-1.05	-3.2	0.00580775	0.0340894
Hebp1	934.9	-1.06	-1.19	4.49384e-06	8.76654e-05
Susd4	89.1	-1.06	-1.2	1.02983e-05	0.000181034
Tspan15	134	-1.06	-1.22	1.64619e-05	0.000269597
Fpr1	89.9	-1.06	-1.32	0.000292908	0.00301924
Ighv2-3	64.5	-1.06	-1.36	0.00090462	0.0077923
Alas2	140.4	-1.06	-1.75	0.00400506	0.0255994
Paqr6	11.7	-1.06	-1.97	0.00437263	0.0274104
Gm15929	8.8	-1.06	-1.92	0.00470881	0.0290724
Gm37829	7	-1.06	-2.2	0.00486582	0.0298397
Gm38160	15.5	-1.06	-2.07	0.00489094	0.0299624
Gm26575	11.1	-1.06	-2.25	0.00498523	0.0304104
Gm2814	9.6	-1.06	-2.68	0.0053047	0.0318273
Sort1	1028.3	-1.07	-1.19	9.44084e-07	2.29306e-05
Cdk14	85	-1.07	-1.26	6.07956e-05	0.000815257
Shank1	125.8	-1.07	-1.41	0.000742935	0.00659505
Ighv1-43	24.1	-1.07	-1.92	0.00422137	0.0266365
Ctsf	383.8	-1.08	-1.16	4.67553e-09	2.09973e-07
Tbxas1	561.4	-1.08	-1.17	1.11095e-07	3.55443e-06
Alpk1	263.7	-1.08	-1.18	2.52956e-07	7.29469e-06
Sccpdh	123.3	-1.08	-1.17	6.20768e-07	1.61465e-05
Lpl	1230.2	-1.08	-1.21	3.07676e-06	6.33915e-05
Stab2	1255.1	-1.08	-1.22	7.89033e-06	0.000143684
Apol9b	51.1	-1.08	-1.23	9.87112e-06	0.000174414
Gm4258	54.5	-1.08	-1.25	1.91667e-05	0.00030483
H2-Ea-ps	7790.9	-1.08	-1.36	0.000365531	0.00363319
Ciita	568.4	-1.08	-1.39	0.000641183	0.00586333
Igkv4-70	65.4	-1.08	-1.47	0.00112443	0.00926459
Ighv1-42	5.8	-1.08	-3.23	0.00225925	0.0160929
Igkv4-50	54.1	-1.08	-1.76	0.00301085	0.0203138
Cd86	1049.2	-1.09	-1.15	3.6122e-11	2.80594e-09
Fam43a	1414.6	-1.09	-1.18	3.93637e-08	1.39104e-06
Smagp	295.1	-1.09	-1.2	3.82405e-07	1.04676e-05
Zfhx3	113.3	-1.09	-1.24	6.08641e-06	0.000114585
Trim30b	52.4	-1.09	-1.36	0.000154265	0.00177828
Fst	29.8	-1.09	-1.52	0.000951531	0.00807537
Pigr	17.1	-1.09	-1.7	0.00270067	0.018704
2010007H06Rik	20.7	-1.09	-1.99	0.00340267	0.0223966
Rgl1	1317.4	-1.1	-1.2	8.25796e-08	2.72813e-06
Clec4a2	262.2	-1.1	-1.26	1.09404e-05	0.000189996
Adhfe1	58	-1.1	-1.3	2.4173e-05	0.000373868
Iglv3	74.4	-1.1	-1.68	0.00197756	0.0143955
C130050O18Rik	95.9	-1.11	-1.26	1.45444e-06	3.32209e-05
Slpi	1443.3	-1.11	-1.38	0.000160296	0.00183775
Mybpc3	45.4	-1.11	-1.44	0.000230602	0.00247771
Adgrl3	33.2	-1.11	-1.64	0.00100508	0.00843843
Gm9530	13.7	-1.11	-1.85	0.00193477	0.0141557
Igkv17-127	57.8	-1.11	-2.86	0.00305561	0.0205274
4930426D05Rik	77.3	-1.11	-2.7	0.00331261	0.0219462
Fcer2a	783	-1.11	-2.3	0.00332077	0.0219918
Nfam1	713.9	-1.12	-1.19	1.76466e-10	1.13551e-08
Epb41l3	649.5	-1.12	-1.23	9.17419e-08	2.97385e-06
Naip5	181.7	-1.12	-1.27	2.06216e-06	4.5015e-05
Gas6	210.8	-1.12	-1.29	1.05644e-05	0.000184835
A530099J19Rik	38	-1.12	-1.84	0.00158088	0.0120523
0610040J01Rik	15.3	-1.12	-1.97	0.00199761	0.0145047
Gm17999	9.8	-1.12	-2.45	0.00273964	0.0189208
Gm14963	10.5	-1.12	-1.98	0.00274794	0.0189628
Tal2	7.8	-1.12	-2.87	0.0029077	0.0197259
Gm10605	75.3	-1.13	-1.35	2.32247e-05	0.000361165
Abcd2	85.6	-1.13	-1.35	3.95743e-05	0.00056262
Pcolce2	67.5	-1.13	-1.42	9.12281e-05	0.00115255
Pigz	58.4	-1.13	-1.4	0.000141032	0.00165224
Trf	681.7	-1.13	-1.49	0.000352696	0.00353208
A930030B08Rik	34.4	-1.13	-1.59	0.000524747	0.00496122
Mir5107	156.7	-1.13	-1.77	0.00151057	0.0115983
Kcnj2	25	-1.13	-2	0.00194534	0.014221
Tlr7	305.4	-1.14	-1.22	3.02948e-09	1.41966e-07
Igsf6	661.8	-1.14	-1.24	3.87727e-08	1.37863e-06
Lrrc25	483.1	-1.14	-1.28	6.56617e-07	1.68502e-05
Ptpro	88.1	-1.14	-1.29	1.05788e-06	2.51977e-05
Tppp	109.8	-1.14	-1.29	1.47041e-06	3.35414e-05
Dll4	78	-1.14	-1.29	2.41074e-06	5.13982e-05
Snn	825.3	-1.14	-1.31	3.98228e-06	7.94842e-05
Pdzd2	59.3	-1.14	-1.35	1.39041e-05	0.000233701
Erbb2	135	-1.14	-1.33	1.54562e-05	0.000255319
Ctnnd2	131.9	-1.14	-1.44	0.000130821	0.00155694
Gm15930	22	-1.14	-1.73	0.00103386	0.00862724
Igkv8-30	318.2	-1.14	-1.89	0.00204402	0.0147857
Blk	523.7	-1.14	-1.98	0.00215622	0.0154869
Cyp4f37	6.6	-1.14	-2.97	0.00267196	0.018535
Tcf4	708.9	-1.15	-1.26	2.3059e-08	8.83674e-07
C1qb	6167.6	-1.15	-1.28	3.35851e-07	9.47913e-06
Ccnd1	258	-1.15	-1.29	3.85515e-07	1.0536e-05
Cfap61	26	-1.15	-1.82	0.00102855	0.00860616
Hepacam2	34.3	-1.15	-2.23	0.00188008	0.0138378
Gm15880	16.2	-1.15	-2.16	0.00213929	0.0153781
Clec4a4	10.7	-1.15	-2.6	0.00224813	0.0160401
Fmnl2	329.1	-1.16	-1.29	1.74213e-07	5.27545e-06
Pdgfc	56.2	-1.16	-1.45	8.77673e-05	0.00111536
Pde8b	30.7	-1.16	-1.81	0.000914257	0.00782838
Gm5466	17.5	-1.16	-1.97	0.00142691	0.0111093
Lima1	405.9	-1.17	-1.27	4.02423e-09	1.82193e-07
Slc16a7	76.5	-1.17	-1.39	1.46214e-05	0.00024315
Snx24	100.2	-1.17	-1.4	1.7861e-05	0.000288132
Fcrl1	520.9	-1.17	-1.52	0.000190957	0.00212592
Plxnb3	46.1	-1.17	-1.66	0.000571219	0.00531034
Gm36937	12.9	-1.17	-2.24	0.00184747	0.0136683
Igkv5-39	123.1	-1.17	-2.24	0.00205008	0.0148171
Tnfrsf21	641.6	-1.18	-1.26	5.226e-11	3.91075e-09
Syk	3325.1	-1.18	-1.29	1.05299e-08	4.3442e-07
Cmbl	316.4	-1.18	-1.31	3.55047e-07	9.90743e-06
AC166361.2	101	-1.18	-1.36	5.35126e-07	1.41538e-05
Stac2	76.6	-1.18	-1.55	0.000205614	0.00225848
Ighv2-6	141.1	-1.18	-1.53	0.000265955	0.00279057
Igkv4-63	73.9	-1.18	-1.74	0.000747901	0.00662773
Igkv9-124	50.6	-1.18	-2.27	0.00168126	0.0126608
Mpeg1	6302.5	-1.19	-1.28	3.51193e-10	2.08121e-08
Siglech	840.4	-1.19	-1.32	1.88742e-07	5.64101e-06
Ccdc148	86.4	-1.19	-1.48	4.04035e-05	0.000573464
Blnk	622	-1.19	-1.59	0.000220607	0.0023957
Ighv1-4	158	-1.19	-1.8	0.000905932	0.00779535
Siglecg	751.8	-1.19	-1.93	0.0010344	0.00862724
Slc6a1	17.6	-1.19	-2.21	0.00121789	0.00981885
Ighv9-2	13.7	-1.19	-2.05	0.00136849	0.0107613
Igkv4-58	47	-1.19	-2.02	0.00140714	0.011025
Fam213b	477.2	-1.2	-1.33	6.59957e-08	2.24035e-06
Gm13710	186.2	-1.2	-1.39	3.18505e-06	6.52331e-05
S1pr3	58.4	-1.2	-1.43	8.88384e-06	0.000159585
Tecta	37.6	-1.2	-1.56	0.000103734	0.00128145
Fam135a	30.1	-1.2	-1.66	0.000222452	0.00241269
Gbgt1	24	-1.2	-1.71	0.000333562	0.00337377
AC153955.5	18.5	-1.2	-1.86	0.00062178	0.00572177
Trim7	268.2	-1.2	-1.88	0.000812048	0.00708334
Igkv6-23	42.9	-1.2	-1.99	0.00113561	0.00931669
Map3k9	162.8	-1.21	-1.3	9.7289e-11	6.6577e-09
Fndc7	27.5	-1.21	-1.78	0.000229843	0.00247294
Apoe	8629.4	-1.22	-1.32	4.18569e-10	2.44686e-08
Sirpa	4992.1	-1.22	-1.35	2.62646e-08	9.78256e-07
Cd300a	1109.4	-1.22	-1.35	3.42247e-08	1.23733e-06
Cystm1	143.7	-1.22	-1.4	5.6475e-07	1.48916e-05
Snta1	208.6	-1.22	-1.4	1.01307e-06	2.42982e-05
Trpv4	50.5	-1.22	-1.54	2.56019e-05	0.000391697
Lifr	153.4	-1.22	-1.49	2.67344e-05	0.000404417
Pcdhgb4	14.2	-1.22	-1.79	0.000529616	0.00500451
Sdc3	7230.4	-1.23	-1.34	1.70962e-09	8.52092e-08
Marcks	880	-1.23	-1.39	3.81116e-07	1.04489e-05
Flt3	441.7	-1.23	-1.43	2.59813e-06	5.47736e-05
Wdfy4	2179.7	-1.23	-1.51	1.93929e-05	0.000307396
Igkv5-45	19.6	-1.23	-2.23	0.00113065	0.00930213
H2-Ob	1767	-1.24	-1.32	1.208e-12	1.33495e-10
Fgd2	1084.5	-1.24	-1.37	3.12625e-08	1.13979e-06
Dmpk	201.4	-1.24	-1.43	5.01191e-07	1.33586e-05
Ttc12	74.5	-1.24	-1.49	8.56547e-06	0.000154349
AC153955.2	13.5	-1.24	-3.15	0.000817306	0.00712004
Dennd5b	158.4	-1.24	-2.45	0.00105763	0.00878554
Ppfibp2	358.3	-1.25	-1.4	4.66761e-08	1.62284e-06
Gm15922	138.1	-1.25	-1.47	1.99902e-06	4.38031e-05
Slc1a3	115.6	-1.25	-1.56	1.6425e-05	0.000269491
Fam71a	57.8	-1.25	-1.63	4.99929e-05	0.000691361
Btnl4	51.4	-1.25	-1.87	0.000251077	0.00266615
Plxnb2	2017.4	-1.26	-1.36	2.1004e-10	1.32679e-08
Mafb	1846.3	-1.26	-1.39	6.80042e-09	2.94038e-07
Scamp5	313.9	-1.26	-1.38	8.03733e-09	3.39715e-07
Lpcat2	297.8	-1.26	-1.41	1.9355e-08	7.65543e-07
Prkcg	96.9	-1.26	-1.45	1.87998e-07	5.62853e-06
Cd300c2	673.6	-1.26	-1.44	3.61766e-07	1.00341e-05
Cecr6	48.6	-1.26	-1.51	3.93002e-06	7.8532e-05
Scn3a	17.9	-1.26	-1.92	0.000286712	0.0029678
A4galt	38.5	-1.26	-1.89	0.000338646	0.00341917
Unc5a	20.3	-1.26	-2.62	0.000664856	0.00603762
Dock4	301.1	-1.27	-1.39	2.00854e-10	1.27813e-08
C1qc	6828	-1.27	-1.42	4.33254e-08	1.52169e-06
Zfp366	189.3	-1.27	-1.44	6.67495e-08	2.26148e-06
Samd4	57.2	-1.27	-1.61	1.40203e-05	0.000234967
Cd209d	96.9	-1.27	-1.89	0.00020554	0.00225848
Ifi207	440.3	-1.28	-1.42	6.18555e-09	2.71425e-07
Glis3	183.7	-1.28	-1.48	3.4558e-07	9.69028e-06
Gpc4	55.1	-1.28	-1.58	6.37825e-06	0.000119558
Tgfb2	26.2	-1.28	-1.82	7.16215e-05	0.000936912
Ffar1	97.9	-1.28	-1.83	0.000194114	0.00215689
Epha2	215.5	-1.29	-1.42	1.18614e-09	6.19847e-08
Cd5l	2824.6	-1.29	-1.41	1.30714e-09	6.72882e-08
Nxpe5	131.7	-1.29	-1.49	3.09025e-07	8.76504e-06
Gm33280	43.4	-1.29	-1.78	7.0014e-05	0.000918168
Gm15448	29.6	-1.29	-1.86	0.000127204	0.00152019
Tlr13	195.6	-1.3	-1.4	5.262e-12	5.12673e-10
Kcnk13	70	-1.3	-1.51	2.62705e-07	7.53801e-06
Rasal2	84.5	-1.3	-1.53	4.32013e-07	1.16772e-05
Cd300c	47.9	-1.3	-1.67	1.67017e-05	0.000273005
Gm14137	13.8	-1.3	-3.35	0.000623795	0.00573419
6430548M08Rik	386.7	-1.31	-1.4	5.27e-13	6.5838e-11
C2	119.2	-1.31	-1.41	2.4023e-11	1.95412e-09
Fgd4	96.4	-1.31	-1.63	4.58104e-06	8.8964e-05
Gm14221	27.8	-1.31	-2.05	0.000180275	0.00202089
Gm28050	11.2	-1.31	-2.15	0.000276715	0.00288336
Il22ra2	7.5	-1.31	-3.06	0.000546279	0.00512545
Rims3	1029.1	-1.32	-1.41	7.3e-14	1.1572e-11
I830077J02Rik	399	-1.32	-1.41	1.456e-12	1.58964e-10
Cfp	5197	-1.32	-1.44	4.77814e-10	2.7587e-08
Sirpb1c	21.5	-1.32	-1.75	2.901e-05	0.000432393
Adam11	386.6	-1.33	-1.39	0	1e-15
Hpgds	565.3	-1.33	-1.43	5.789e-12	5.60813e-10
Hdac9	184.1	-1.33	-1.49	8.3867e-09	3.52753e-07
Clec4a1	389.4	-1.33	-1.52	6.73055e-08	2.26696e-06
Gm10552	10.1	-1.33	-2.86	0.000375577	0.00371378
Abcg3	1117.1	-1.34	-1.42	6e-15	1.18e-12
Slc7a7	700.4	-1.34	-1.45	1.164e-11	1.03474e-09
Amz1	508.4	-1.34	-1.46	4.3129e-11	3.29097e-09
Pirb	1339.8	-1.34	-1.49	2.08267e-09	1.01457e-07
Cd14	1110.8	-1.34	-1.51	5.29753e-09	2.36062e-07
Cyp27a1	464.9	-1.34	-1.52	1.70764e-08	6.81674e-07
Clec4b1	78.8	-1.34	-1.73	1.21667e-05	0.000207944
Rasgef1b	1868	-1.35	-1.41	0	1e-15
Jup	1184.5	-1.35	-1.44	1.31e-13	1.9844e-11
Grk3	1230.7	-1.35	-1.46	3.6e-12	3.63084e-10
C1qa	7016.9	-1.35	-1.51	8.14532e-09	3.43438e-07
Dgki	117.3	-1.35	-1.56	3.90665e-08	1.38337e-06
Agap1	495.9	-1.36	-1.51	6.1554e-10	3.45765e-08
Timd4	240.3	-1.36	-1.53	7.80868e-09	3.33318e-07
Ighv1-7	114.3	-1.36	-1.76	1.71443e-05	0.000278393
Tlr8	86.3	-1.37	-1.62	2.20946e-07	6.47997e-06
Zfp608	304	-1.38	-1.52	1.85781e-10	1.18659e-08
Kif26a	36.7	-1.38	-2.16	8.08151e-05	0.00103695
Reln	18.1	-1.38	-2.59	0.000203572	0.00224607
Dhtkd1	7	-1.38	-3.09	0.000253262	0.00268439
Gm15848	16.2	-1.38	-3.38	0.000269929	0.00282288
Prkar1b	244.4	-1.39	-1.54	8.0542e-11	5.66917e-09
Slc16a9	181.6	-1.39	-1.59	1.73944e-08	6.92762e-07
Gfra4	95	-1.39	-1.61	2.35273e-07	6.86511e-06
Pid1	185.8	-1.39	-1.68	7.40114e-07	1.86053e-05
Apoc1	69.6	-1.39	-1.83	1.30167e-05	0.000220072
Scn4a	77.9	-1.39	-2.02	7.4403e-05	0.000967631
Ptgs1	1227.5	-1.4	-1.51	1.124e-12	1.25921e-10
AC125351.1	47.4	-1.4	-1.8	2.46306e-06	5.23742e-05
Fstl4	14.3	-1.4	-2.76	0.000124017	0.00148578
Plbd1	1881.3	-1.41	-1.54	2.0592e-11	1.71551e-09
Gm15931	220.2	-1.41	-1.6	2.86724e-09	1.36214e-07
Tcf7l2	320.1	-1.41	-1.64	2.25674e-08	8.70638e-07
Capn9	80.5	-1.41	-1.69	1.31969e-07	4.12284e-06
March1	226	-1.41	-1.68	2.64495e-07	7.57676e-06
Mcc	21.2	-1.41	-2.32	6.52685e-05	0.000866479
Etv1	13.7	-1.41	-2.38	6.8165e-05	0.000895282
AC160028.2	11.6	-1.41	-3.13	0.000179399	0.00201284
Nav1	825.1	-1.42	-1.59	2.42214e-10	1.50371e-08
Igf1	580.6	-1.42	-1.61	3.16666e-09	1.47194e-07
Cpne8	29	-1.42	-1.91	1.06242e-05	0.000185439
Csf1r	9890.8	-1.43	-1.54	1.16e-13	1.791e-11
Hpgd	485.4	-1.43	-1.57	1.7422e-11	1.47278e-09
Tmem26	319.6	-1.43	-1.58	5.0818e-11	3.82689e-09
Prss29	62.2	-1.43	-1.75	1.22166e-07	3.85852e-06
Ighv5-2	17.8	-1.43	-3.08	0.000154087	0.00177742
Cd209b	9.6	-1.43	-3.28	0.000159843	0.00183522
Axl	7411.5	-1.44	-1.56	4.08e-13	5.3277e-11
Tbc1d9	512.6	-1.44	-1.57	1.195e-12	1.33003e-10
Plpp3	349.2	-1.44	-1.62	4.78314e-10	2.7587e-08
Clec4a3	317.3	-1.44	-1.61	4.9011e-10	2.81732e-08
Scnn1a	79.5	-1.44	-1.72	1.0847e-07	3.48987e-06
Jhy	47.7	-1.44	-2.65	9.58659e-05	0.00120672
Nr1d1	927.5	-1.45	-1.54	0	1.35e-13
Itga9	882.5	-1.45	-1.6	8.134e-12	7.66494e-10
Slc45a3	1350.4	-1.45	-1.59	2.0072e-11	1.68026e-09
Clec4n	902.8	-1.45	-1.62	1.38645e-10	9.12569e-09
Lrp4	160.7	-1.45	-1.7	9.8475e-09	4.07242e-07
Cacna1e	284.9	-1.45	-1.73	1.1389e-07	3.62367e-06
Mmp12	54	-1.45	-2.08	1.41969e-05	0.000237004
P2ry13	230.8	-1.46	-1.59	5.57e-13	6.9159e-11
Nuak1	190.3	-1.46	-1.6	6.64e-13	7.9017e-11
Adap2	260.1	-1.46	-1.72	4.52432e-08	1.57939e-06
Adgrg6	43.3	-1.46	-1.97	4.04753e-06	8.05071e-05
Kcnj10	1374.3	-1.47	-1.58	4e-15	8.36e-13
Ppp1r9a	128.9	-1.47	-1.8	1.42796e-07	4.44498e-06
Rab30	116	-1.47	-2.11	1.85834e-05	0.000296732
Gfra2	1060.6	-1.48	-1.62	4.86e-12	4.81649e-10
St6galnac2	280.3	-1.48	-1.68	7.6004e-10	4.14775e-08
2900052N01Rik	111.1	-1.48	-1.76	1.26361e-08	5.15153e-07
Slc8a1	117.6	-1.48	-1.88	7.25403e-07	1.83156e-05
Ighv1-39	28.6	-1.48	-2.7	9.84318e-05	0.00123093
Gpr137b	186	-1.49	-1.71	1.37043e-09	7.0128e-08
Trpm2	1260.6	-1.5	-1.66	3.186e-12	3.30935e-10
Aatk	130.6	-1.5	-1.7	7.8915e-11	5.60034e-09
A530064D06Rik	30	-1.5	-1.98	7.10012e-07	1.79533e-05
Pyroxd2	242.8	-1.51	-1.68	9.755e-12	9.04425e-10
Hcar2	808.2	-1.51	-1.74	8.34443e-10	4.49687e-08
Catsperg2	14.8	-1.51	-2.17	9.58493e-06	0.000170229
Slc40a1	4625.9	-1.53	-1.66	1e-14	1.893e-12
Mmp19	385.3	-1.53	-2.04	1.82174e-06	4.01225e-05
Mpzl1	469.8	-1.55	-1.7	2.45e-13	3.3824e-11
Dnah2	262.4	-1.55	-1.85	3.80901e-09	1.73774e-07
Igkv6-15	223	-1.55	-2.65	3.22373e-05	0.000469935
Cadm1	1067.9	-1.56	-1.72	1.47e-13	2.1877e-11
Ear2	200.6	-1.56	-1.76	4.6432e-11	3.52741e-09
Cd302	387	-1.57	-1.73	3.57e-13	4.6958e-11
Lilra6	252.1	-1.58	-1.75	2.95e-13	3.9403e-11
Cd163	1248.1	-1.58	-1.77	1.1893e-11	1.05178e-09
Lilra5	286.1	-1.58	-1.8	2.9471e-11	2.34206e-09
Treml4	1601.2	-1.59	-1.7	0	2e-15
Slc11a1	1813.6	-1.59	-1.72	4e-15	8.92e-13
Itgb5	955.2	-1.6	-1.73	1e-15	2.17e-13
Adgre1	1926.6	-1.6	-1.75	1.8e-14	3.257e-12
Rgl3	91.8	-1.6	-1.86	2.53327e-10	1.56581e-08
Ccr3	902.9	-1.61	-1.75	2e-15	5.62e-13
Siglec1	622.7	-1.61	-1.78	1.007e-12	1.14993e-10
Slco2b1	818.9	-1.62	-1.75	1e-15	1.75e-13
Apod	9.3	-1.62	-3.32	1.9966e-05	0.000315306
C6	1221.3	-1.63	-1.78	1.5e-14	2.845e-12
Sirpb1b	32.1	-1.64	-2.12	2.6062e-08	9.72814e-07
Sirpb1a	105.6	-1.65	-1.88	3.329e-12	3.41742e-10
Lhfp	173.9	-1.66	-1.92	3.9551e-11	3.0314e-09
Hmox1	16492.8	-1.66	-2.02	3.05906e-09	1.42577e-07
Gm2762	38.5	-1.66	-1.94	2.81955e-08	1.04118e-06
Pilra	854.5	-1.67	-1.82	1e-15	1.75e-13
Angptl7	118.5	-1.67	-1.89	2.224e-12	2.3826e-10
Matn2	73.1	-1.67	-2	5.50652e-10	3.12368e-08
Mertk	1388.9	-1.67	-2.06	6.30935e-09	2.76154e-07
Cxcl1	159.6	-1.67	-2.1	1.42301e-08	5.76051e-07
Adamdec1	659.5	-1.68	-1.83	0	1.2e-13
Tenm4	307.5	-1.68	-1.89	1.99e-13	2.8193e-11
Bank1	715.4	-1.68	-1.96	5.8047e-11	4.31478e-09
Gm5150	271.8	-1.69	-1.83	0	9e-15
Igkv3-7	151.3	-1.69	-3.52	8.25931e-06	0.000149299
Aspa	38.6	-1.7	-2.48	1.26682e-07	3.99385e-06
Gdf15	168.7	-1.71	-2.33	5.2971e-08	1.82332e-06
Adam22	142.7	-1.72	-2.24	2.59454e-08	9.7056e-07
Vcam1	9147.6	-1.73	-1.91	6e-15	1.201e-12
Fjx1	45.8	-1.73	-3.32	1.22608e-06	2.85727e-05
Paqr9	427.9	-1.74	-1.96	4e-14	6.626e-12
Slc22a23	202.4	-1.75	-1.94	0	7.9e-14
Dlc1	173.9	-1.75	-2.01	6.48e-13	7.829e-11
Sema6a	113.4	-1.75	-2.11	8.3512e-11	5.80711e-09
Snx31	36.9	-1.75	-2.37	2.41618e-08	9.17284e-07
Mrc1	3441.3	-1.76	-1.96	3e-15	6.66e-13
Pira2	53.5	-1.76	-2.34	7.74855e-09	3.31572e-07
Siglece	886.5	-1.77	-1.91	0	0
Il1a	348.3	-1.77	-2.22	7.34008e-10	4.0184e-08
Cecr2	73.9	-1.77	-2.86	9.9273e-07	2.38767e-05
Pilrb1	346.4	-1.78	-2.02	4e-14	6.675e-12
Stra6l	77.8	-1.78	-2.07	1.675e-12	1.80489e-10
Sash1	878.3	-1.8	-2.01	1e-15	1.46e-13
Hfe	584	-1.81	-2.02	2e-15	5.33e-13
Kirrel3	96.4	-1.82	-2.06	1e-14	1.896e-12
Gm14548	229.3	-1.82	-2.13	2.568e-12	2.69988e-10
Gpd1	933.9	-1.84	-2.05	1e-15	1.85e-13
Ace	93.4	-1.84	-2.73	5.03291e-08	1.74633e-06
Pilrb2	349.2	-1.85	-2.1	4e-15	9.43e-13
Spic	2050.5	-1.86	-2.04	0	1e-15
Lrp1	4560.8	-1.86	-2.08	0	6.6e-14
Slc15a2	279.3	-1.89	-2.18	1.7e-14	3.026e-12
Vstm4	221	-1.89	-2.18	2e-14	3.631e-12
Abcc3	2372	-1.9	-2.04	0	0
Cd209a	127.2	-1.9	-2.44	1.67737e-10	1.09156e-08
Cd300e	272.8	-1.91	-2.34	7.548e-12	7.15238e-10
Sned1	230.5	-1.92	-2.29	9.22e-13	1.06765e-10
Myo18b	126.8	-1.96	-2.34	1.63e-13	2.4011e-11
Ptprm	389.7	-1.98	-2.21	0	0
Kcnj16	221.3	-1.98	-2.22	0	4e-15
Gm6377	147.2	-1.99	-2.51	8.923e-12	8.31806e-10
Mybpc2	29.1	-1.99	-3.53	2.54352e-08	9.53543e-07
Sema6d	939.7	-2.01	-2.3	0	2.2e-14
Cbr2	76.5	-2.01	-2.9	8.13405e-10	4.42498e-08
Itgad	5960.5	-2.04	-2.25	0	0
Adam23	301.5	-2.04	-2.27	0	0
Postn	510.9	-2.04	-2.28	0	1e-15
Cbln1	33.6	-2.04	-2.89	1.24764e-10	8.2752e-09
Rnf150	123.1	-2.07	-2.32	0	0
Hs3st2	297.9	-2.13	-2.53	0	1.3e-13
Fcna	5828.3	-2.2	-2.39	0	0
Col14a1	699.7	-2.25	-2.55	0	0
Akr1b7	148.5	-2.26	-2.71	0	9e-15
Wisp2	41.1	-2.27	-3.56	1.6573e-11	1.41486e-09
Adgre4	851.8	-2.37	-2.61	0	0
Nfasc	204.4	-2.38	-2.98	0	1.5e-14
